# Supplementary material for: WFS1 functions in ER export of vesicular cargo proteins in pancreatic β-cells
Source: PubMed Central journal article supplement (PMC8632972; doi:10.1038/s41467-021-27344-y), 2021-11-30
Supplement: 41467_2021_27344_MOESM1_ESM.pdf [file 41467_2021_27344_MOESM1_ESM.pdf]

## Supplementary Information

WFS1 functions in ER export of vesicular cargo proteins in pancreatic  $\beta$ -cells

Linlin Wang<sup>1</sup>, Hongyang Liu<sup>2</sup>, Xiaofei Zhang<sup>3, 4</sup>, Eli Song<sup>2, 3</sup>, You Wang<sup>2</sup>, Tao Xu<sup>1, 2, 3, 5\*</sup>,

Zonghong Li<sup>1\*</sup>

Supplementary information includes the following:

Supplementary Figures 1-7

Supplementary Tables 1-3

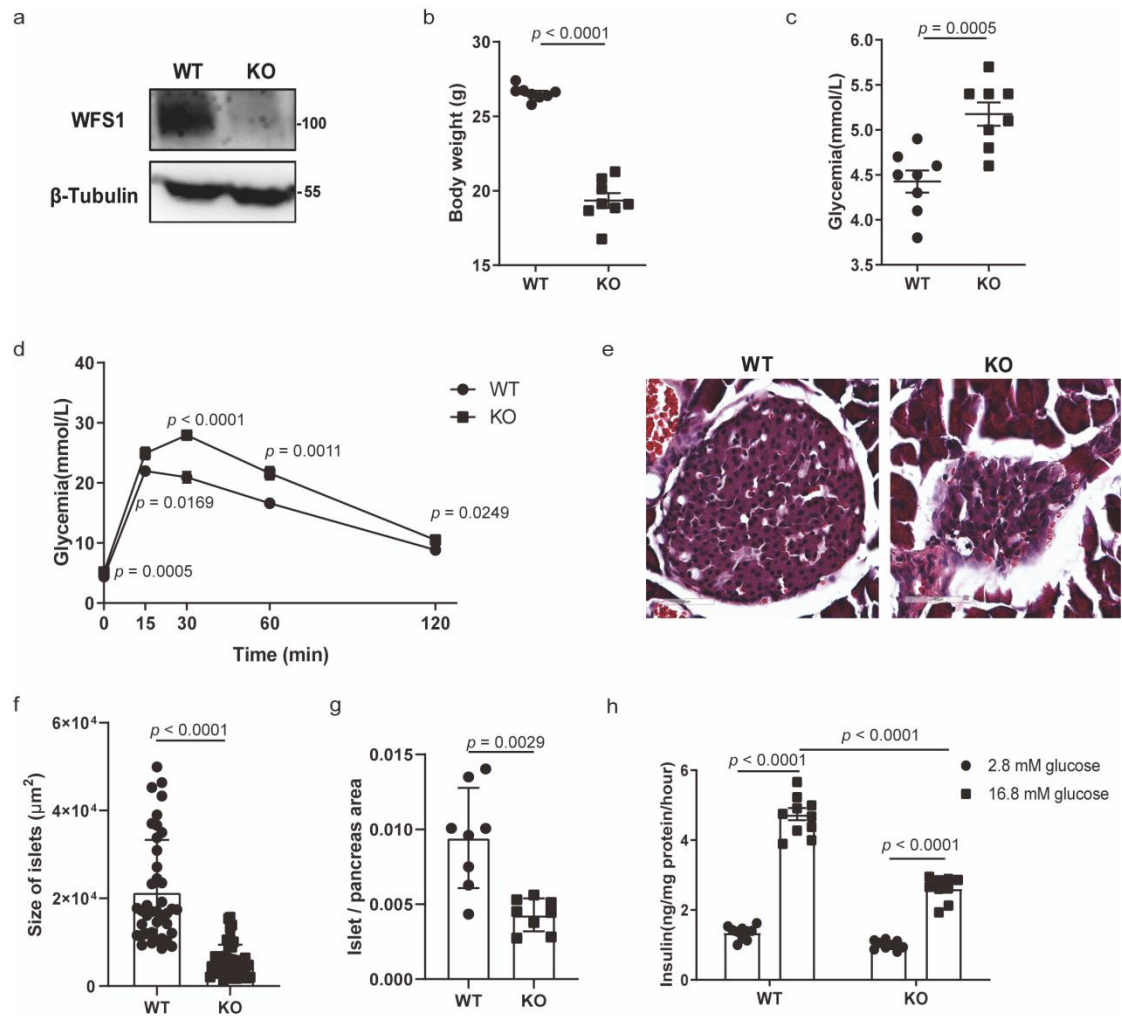

Supplementary Fig. 1: The phenotype of WFS1-deficient mice. **a**, IB analysis of WFS1 protein in islets derived from the WT and *Wfs1* KO mice;  $\beta$ -tubulin was used as the loading control.  $n = 3$  independent experiments. **b**, Comparison of body weight of the WT and *Wfs1* KO mice at 8 weeks. WT/KO = 8/8, male. **c**, Comparison of fasted blood glucose of the WT and *Wfs1* KO mice. WT/KO = 8/8, male. **d**, Blood glucose during the GTT in the WT and *Wfs1* KO mice. I.p. administration of 2 g/kg body weight glucose. WT/KO = 8/8. **e**, Representative images of islets stained with haematoxylin and eosin in pancreatic sections of the WT and *Wfs1* KO mice. Scale bar: 60  $\mu\text{m}$ . **f**, Comparison of islet size between the WT and *Wfs1* KO mice. WT/KO = 8/8, 5 slices per mouse. **g**, Comparison of islet size per pancreas between the WT and *Wfs1* KO mice. WT/KO = 8/8. **h**, Glucose-stimulated insulin secretion *in vitro* islets isolated from the WT and *Wfs1* KO mice. WT/KO = 10/9 independent experiments. All the data are presented as the mean  $\pm$  s.e.m.  $p < 0.05$ , significant, using a two-tailed Student's t-test. Source data are provided as a Source Data file.

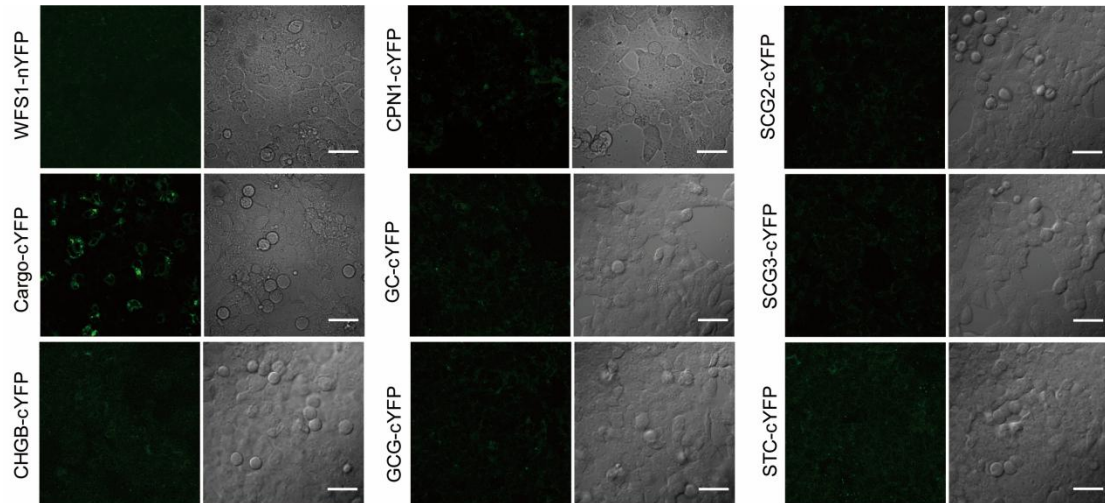

Supplementary Fig. 2: Representative live images of reconstituted BiFC fluorescence between WFS1-tagged nYFP and vesicular cargo protein-tagged cYFP. HEK-293T cells pairwise expressing WFS1-tagged nYFP and CHGB, CPN1, GC, GCG, SCG2, SCG3 or STC-tagged cYFP were exposed to low-temperature treatment to allow for fluorophore maturation. The green fluorescence shows reconstitution of YFP as an indicator of protein–protein interactions. Scale bar, 40  $\mu\text{m}$ .  $n = 3$  independent experiments.

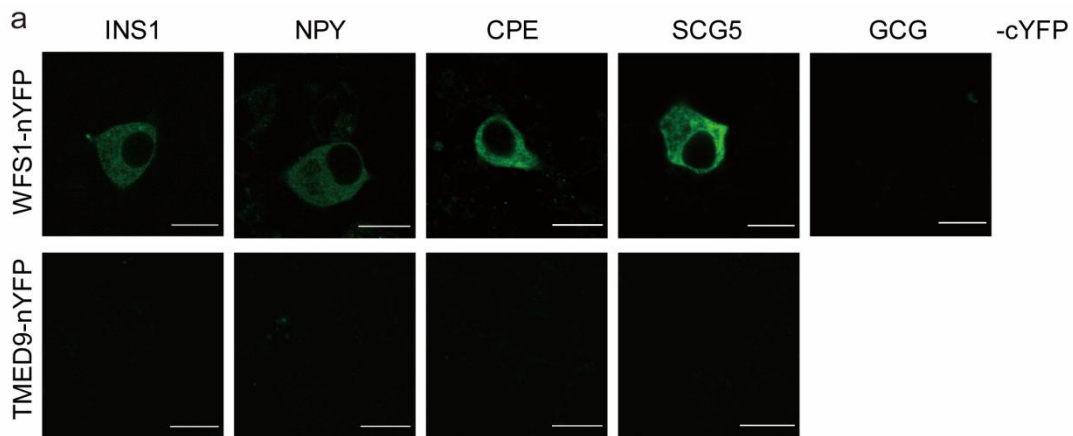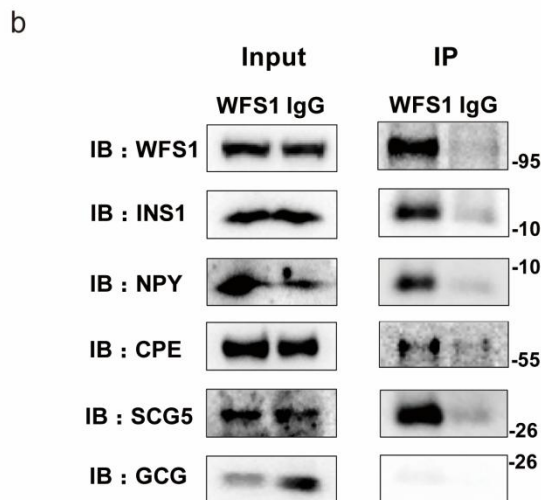

**Supplementary Fig. 3: WFS1 interacts with vesicular cargo proteins in INS1 cells.** a, Representative live imaging of reconstituted BiFC fluorescence between WFS1-tagged nYFP or nYFP-tagged TMED9, and vesicular cargo protein (INS1, NPY, CPE, SCG5 and negative control GCG)-tagged cYFP. Green fluorescence shows reconstitution of YFP as an indicator of protein–protein interactions. n = 3 independent experiments. Scale bar, 10  $\mu$ m. b, IP analysis of the interaction of WFS1 with endogenous vesicular cargo proteins in INS1 cells. The immunoprecipitates pulled down by the WFS1 antibody were analysed by IB with the indicated antibodies. GCG was used as a negative control. Input represents 5% of the total cell extract used for immunoprecipitation. Molecular weights are in kDa. n = 3 independent experiments. Source data are provided as a Source Data file.

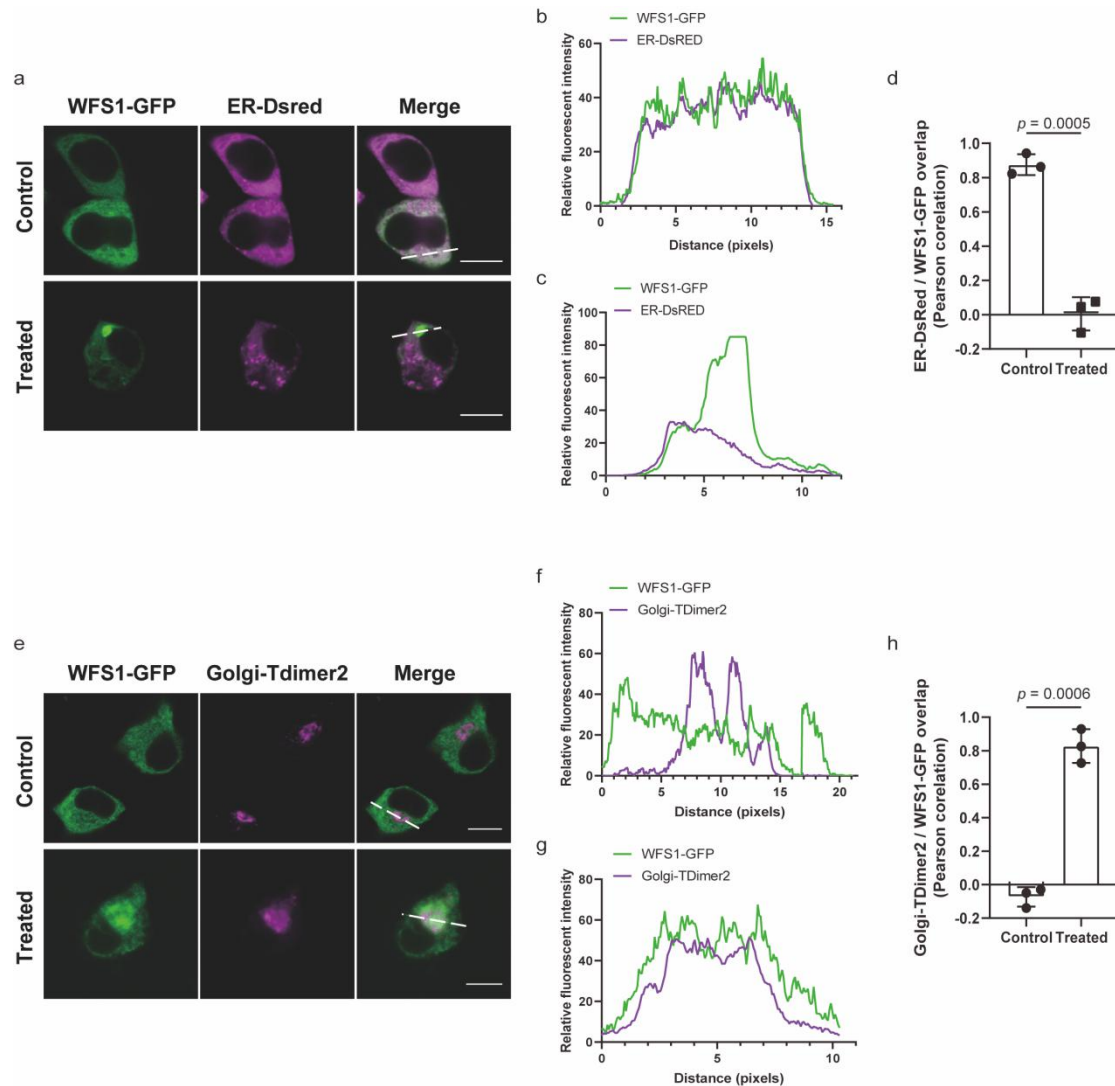

**Supplementary Fig. 4:** WFS1 traffics from the ER to the Golgi in INS1 cells. **a-d**, Confocal microscopy analysis of colocalization of WFS1-GFP and ER-Dsred in INS1 cells treated with normal (37 °C) or low temperature (30 °C) (**a**). Trace outline is used for line-scan (white dashed line) analysis of the relative fluorescence intensity of WFS1 and ER signals after treatment with normal (37 °C, **b**) or low temperature (30 °C, **c**). Signal overlap was quantified by Pearson correlation analysis of  $n = 3$  independent experiments (**d**). Scale bar, 5 μm. **e-h**, Confocal microscopy analysis of colocalization of WFS1-GFP and Golgi-TDimer2 in HEK-293T cells treated with normal (37 °C) or low temperature (30 °C) (**e**). Trace outline is used for line-scan (white dashed line) analysis of the relative fluorescence intensity of WFS1 and Golgi signals after treatment with normal (37 °C, **f**) or low temperature (30 °C, **g**). Signal overlap was quantified by Pearson correlation analysis of  $n = 3$  independent experiments (**h**). Scale bar, 5 μm. All the data are presented as the mean  $\pm$  s.e.m.  $p < 0.05$ , significant, using a two-tailed Student's t-test. Source data are provided as a Source Data file.

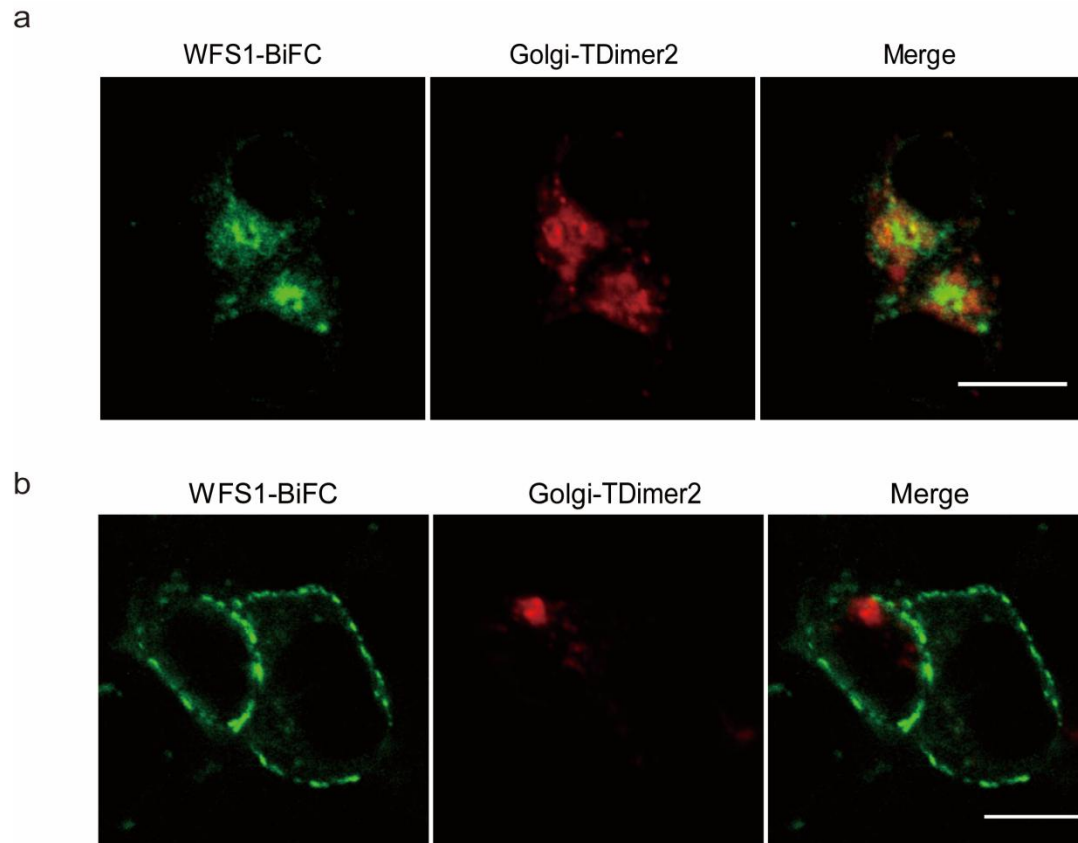

Supplementary Fig. 5: Trafficking of homodimer WFS1 in the secretory pathway. a, Confocal microscopy showing the colocalization of homodimer WFS1 (BiFC) and Golgi-TDimer2 (Golgi marker) in HEK-293T cells exposed to low-temperature treatment. n = 3 independent experiments. Scale bar, 10  $\mu$ m. b, Confocal microscopy showing homodimer WFS1 trafficking to the plasma membrane in HEK-293T cells after recovery to normal temperature (37  $^{\circ}$ C) for 2 hrs. n = 3 independent experiments. Scale bar, 10  $\mu$ m.

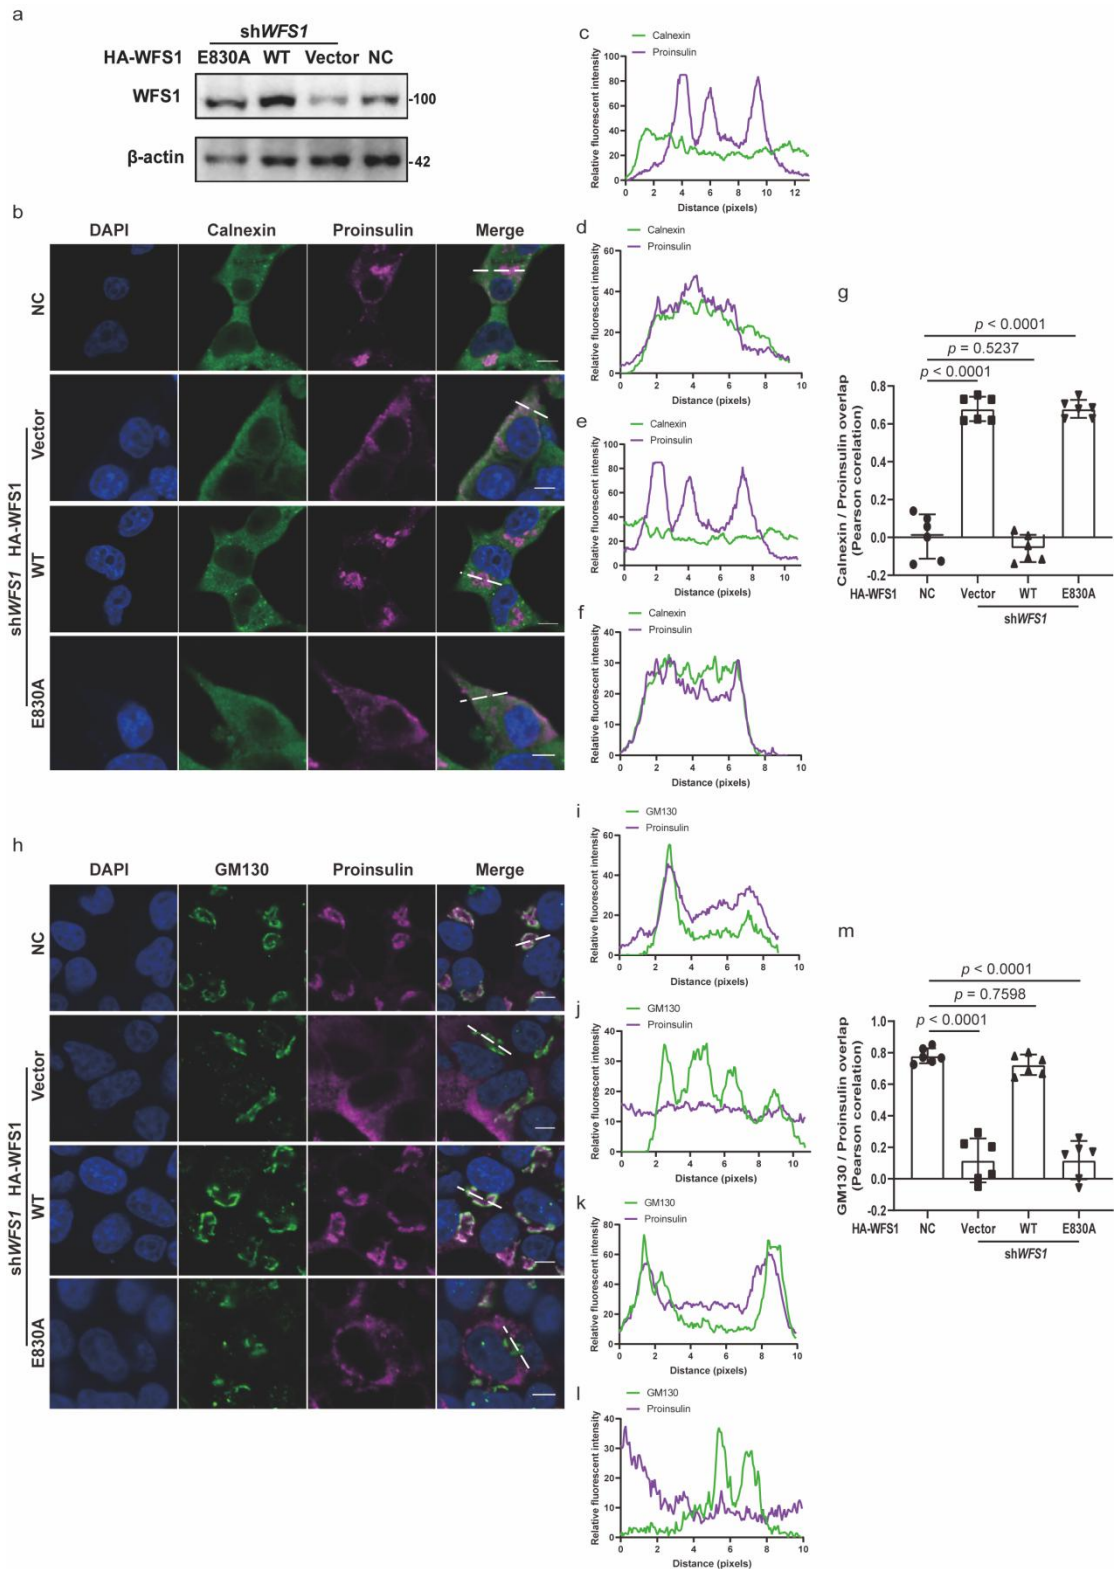

Supplementary Fig. 6: The effect of E830A mutant WFS1 on proinsulin distribution. a, IB analysis of WFS1 protein in scrambled (NC), shWfs1, rescued WT-Wfs1 and E830A mutant Wfs1 INS1 cells;  $\beta$ -actin was used as the loading control.  $n = 3$  independent experiments. b-m, Confocal microscopy analysis of colocalization of proinsulin with calnexin (b-g) or GM130 (h-m). Trace outline is used for line-scan (white dashed line) analysis of the relative fluorescence intensities of proinsulin with calnexin or GM130

signals. Signal overlap was quantified by Pearson correlation analysis.  $n = 3$  independent experiments,  $n = 6$  independent images quantified. Scale bar,  $5 \mu\text{m}$ . All the data are presented as the mean  $\pm$  s.e.m.  $p < 0.05$ , significant, using a two-tailed Student's t-test. Source data are provided as a Source Data file.



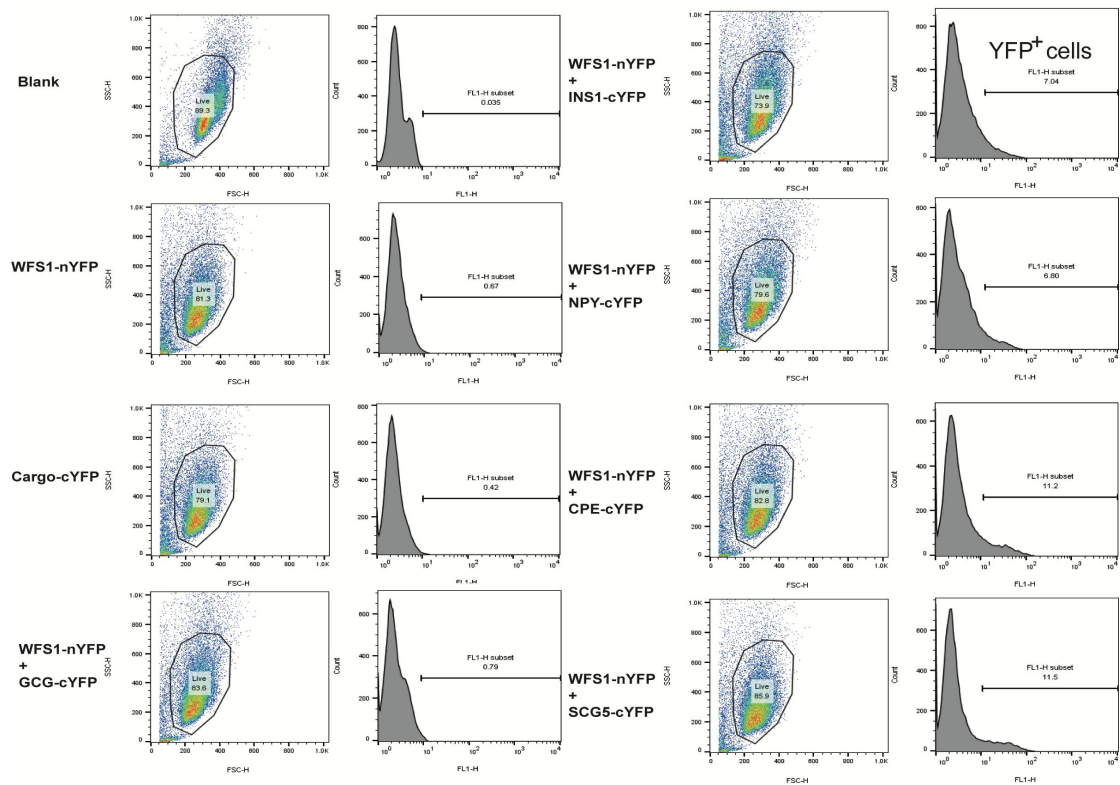

Supplementary Fig. 7: Gating strategies used for flow cytometry. Cells were selected in the FSC-H/SSC-H dot plot to remove debris. Untransfected HEK-293T cells, WFS1-nYFP transfected HEK-293T cells or cargo-cYFP transfected HEK-293T cells as the negative control sample to gate the YFP<sup>-</sup> and YFP<sup>+</sup> cells.

Supplementary Table 1. The oligonucleotides are used for *Wfs1* KO mice.

| Primer name | Sequence                   |
|-------------|----------------------------|
| sgRNA1      | CAGGTCCCATGCATCCCCCA       |
| sgRNA2      | CTGTAAAGTGCTCTTCGTGA       |
| WFS1-KO-tF1 | GGCTGAAGTAAGCTCTATTCAGGAC  |
| WFS1-KO-tR1 | GAGCCCAGTTTGGACATGCTATAC   |
| WFS1-WT-tF1 | TTGGACAGTGTAGTCCGTCTCAG    |
| WFS1-WT-tR1 | AATCACCTGTGCCTGCTTGAG      |
| WFS1-S1-tF1 | ACCCTCAACAAAGGCTTGGGAAC    |
| WFS1-S1-tR1 | CTCTGGAAAAGCAAGCAGGGTC     |
| WFS1-S1-tF2 | TCTGAGCCAATCCCCTATGTGC     |
| WFS1-S1-tR2 | CATGAAGACGCTATTGGCCTGG     |
| WFS1-S1-tF3 | AAATCAGCACCAAGTGGGATGAC    |
| WFS1-S1-tR3 | CTGAGGCAGATAAATGAGGGAGTG   |
| WFS1-S2-tF1 | CCTATGTACGAACAGACAGGTATCCC |
| WFS1-S2-tR1 | CACTCACCCACTCTGACTTCCCTAC  |
| WFS1-S2-tF2 | ACCCTATCCTTCCTTCCCATAGTG   |
| WFS1-S2-tR2 | ATGCCTGCTGGGATTTGGTAC      |
| WFS1-S2-tF3 | GGGAGAGTGCTGTGTTTAGAGGCA   |
| WFS1-S2-tR3 | GAACCCTGTTTTGAGTCTATGTGTCC |

Supplementary Table 2. The oligonucleotides are used for cloning.

| Primer name            | Sequence                                                                |
|------------------------|-------------------------------------------------------------------------|
| WFS1-F                 | GCGTTTAAACTTAAGCTTATGAGCTCAGGCACCCAC                                    |
| WFS1-nYFP-R            | GCAATGGAACGGGATCC GCGGCAGACAGGAATGGG                                    |
| WFS1-cYFP-R            | GCAGGCGGGCCTGGATCCGCGGCAGACAGGAATGGG                                    |
| WFS1- $\Delta$ CT-R    | GCAATGGAACGGGATCCCCGGTACACGTAGAACCAGC                                   |
| WFS1- $\Delta$ NT-F    | GCGTTTAAACTTAAGCTTATGATCAAAGAGTACCTGATTGACG                             |
| WFS1- $\Delta$ NT-R    | GCAATGGAACGGGATCC GCGGCAGACAGGAATGGG                                    |
| HA-WFS1-F              | GCGTTTAAACTTAAGCTTTACCCATACGACGTCCCAGACTACGC<br>TATGAGCTCAGGCACCCCA     |
| HA-WFS1-R              | CACACTGGACTAGTGGATCC TCAGGCGGCAGACAGGAA                                 |
| HA- $\Delta$ NT-WFS1-F | GCGTTTAAACTTAAGCTTTACCCATACGACGTCCCAGACTACGC<br>TATGATCAAAGAGTACCTGATTG |
| HA- $\Delta$ NT-WFS1-R | CACACTGGACTAGTGGATCC TCAGGCGGCAGACAGGAA                                 |
| HA- $\Delta$ CT-WFS1-F | GCGTTTAAACTTAAGCTTTACCCATACGACGTCCCAGACTACGC<br>TATGAGCTCAGGCACCCCA     |
| HA- $\Delta$ CT-WFS1-R | CACACTGGACTAGTGGATCCTCACCGGTACACGTAGAACCAGC                             |
| G695V-F                | CTGTGCAGCCACCTGGAGGTCCACA                                               |
| G695V-R                | CTGTCCACGTGACCCTGTGGACCTCCAGGTGGCT                                      |
| P724L-F                | GTCGGCCATCAACATGCTCCTGTTCTTCCTGG                                        |
| P724L-R                | ATCCAGTCACCCAGGAAGAACAGGAGCATGT                                         |
| E809K-F                | CTGCGAGCCAGCAGC AAG TTCAAGGACGTGCTG                                     |
| E809K-R                | CAGCACGTCTTGAACCTTGCTGCTGGCTCGCAG                                       |
| E830A-F                | CATAGAGTTCAGCACCATCCTCGCGGGCCGCCTGGGTAGC                                |
| E830A-R                | GCTACCCAGGCGGCCCGCGAGGATGGTGCTGAACTCTATG                                |
| E158K-F                | ACCGGAAAGGCATCACTTCTAAGAATGAGGCCGAGGTGAAGCA                             |
| E158K-R                | TGCTTACCTCGGCCTCATTCTTAGAAGTGATGCCTTCCGGT                               |
| E169K-F                | AGGTGAAGCAGCTATCCTCTAAGACCGACCTGGAAAGGGCAGT                             |
| E169K-R                | ACTGCCCTTTCAGGTCCGGTCTTAGAGGATAGCTGCTTACCT                              |
| INS1-cYFP-F            | GCGTTTAAACTTAAGCTT ATGGCCCTGTGGATGCGC                                   |
| INS1-cYFP-R            | GCAGGCGGGCCTGGATCCGTTGCAGTAGTTCTCCAGTT                                  |
| GCG-cYFP-F             | GCGTTTAAACTTAAGCTT ATGAAGACCGTTTACATCGT                                 |
| GCG-cYFP-R             | GCAGGCGGGCCTGGATCCTTTCTTGTCAGTGATCTTGGT                                 |
| NPY-cYFP-F             | GCGTTTAAACTTAAGCTT ATGATGCTAGGTAACAAACG                                 |
| NPY-cYFP-R             | GCAGGCGGGCCTGGATCCCCACATGGAAGGGTCTTC                                    |
| CPE-cYFP-F             | GCGTTTAAACTTAAGCTT ATGGCCGGGCGCGGAGGA                                   |
| CPE-cYFP-R             | GCAGGCGGGCCTGGATCCAAAATTCAAAGTCTCTGACATCATT                             |
| SCG2-cYFP-F            | GCGTTTAAACTTAAGCTT ATGACTGAATCGAAGGCTTAC                                |
| SCG2-cYFP-R            | GCAGGCGGGCCTGGATCCCATGTTTTCCATGGCCCGT                                   |
| SCG3-cYFP-F            | GCGTTTAAACTTAAGCTT ATGGGGTTCCTTTGGACAGG                                 |
| SCG3-cYFP-R            | GCAGGCGGGCCTGGATCCCAGGCTGCTGTAGATGCGT                                   |
| SCG5-cYFP-F            | GCGTTTAAACTTAAGCTT ATGACCTCAAGGATGGCCAT                                 |

|               |                                                                                 |
|---------------|---------------------------------------------------------------------------------|
| SCG5-cYFP-R   | GCAGGCGGGCCTGGATCCTTCTGGCTCCTTCTCCTCTT                                          |
| CHGB-cYFP-F   | GCGTTTAAACTTAAGCTT ATGCAGCGGGCCATGCTCCT                                         |
| CHGB-cYFP-R   | GCAGGCGGGCCTGGATCCGCCCGCTGGCTGAACCTTTTC                                         |
| STC-cYFP-F    | GCGTTTAAACTTAAGCTT ATGCTCCAAAACCTCAGCAGT                                        |
| STC-cYFP-R    | GCAGGCGGGCCTGGATCCCGCATTCTCTTGGGAGGTG                                           |
| GC-cYFP-F     | GCGTTTAAACTTAAGCTT ATGAAGAGGGTTCTGGTTCT                                         |
| GC-cYFP-R     | GCAGGCGGGCCTGGATCCGACTGCAGGATGTCTCTC                                            |
| CPN1-cYFP-F   | GCGTTTAAACTTAAGCTT ATGCCAGACCTGCCCTCAG                                          |
| CPN1-cYFP-R   | GCAGGCGGGCCTGGATCCTGCAGGGCCCCTGTGCC                                             |
| nYFP-TMED9    | GCGTTTAAACTTAAGCTT ATGGCTGCGGTGCGAGG                                            |
| nYFP-TMED9    | GCAATGGAACGGGATCCCACCAACTTCTTGGCTTCAAAA                                         |
| sumo-SEC24A-F | GAACAGATTGGTGGATCCATGGCCCAGCCCAGGATC                                            |
| sumo-SEC24A-R | CAGTGGTGGTGGTCTCGAGTCACTTGTTCACTTGCT                                            |
| sumo-SEC24B-F | GAACAGATTGGTGGATCC ATGTCGGCCCCCGCCGGGT                                          |
| sumo-SEC24B-R | TCAGTGGTGGTGGTCTCGAG TCACTTACAAACCTGCTG                                         |
| sumo-SEC24C-F | GAACAGATTGGTGGATCC ATGAATGTCAACCAGTCA                                           |
| sumo-SEC24C-R | TCAGTGGTGGTGGTCTCGAG TTAGCTCAGCAGCTGCCG                                         |
| sumo-SEC23A-F | GAACAGATTGGTGGATCC ATGACAACCTATTTGGAA                                           |
| sumo-SEC23A-R | TCAGTGGTGGTGGTCTCGAG TCAAGCAGCACTTGACAC                                         |
| sumo-SEC23B-F | GAACAGATTGGTGGATCC ATGGCAACATATCTGGAA                                           |
| sumo-SEC23B-R | TCAGTGGTGGTGGTCTCGAG TTAAGAGGCACTGGACAC                                         |
| SEC24A-Myc-F  | GCTAGCGTTTAAACTTAAGCTTATGGCCCAGCCCAGGATCCCCG                                    |
| SEC24A-Myc-R  | CACACTGGACTAGTGGATCCTCACAGATCCTCTTCTGAGATGAG<br>TTTTTGTTCCTCGAGCTTGTTCACTTGCTG  |
| SEC24B-Myc-F  | GCTAGCGTTTAAACTTAAGCTTATGTCGGCCCCCGCCGGGTCC                                     |
| SEC24B-Myc-R  | CACACTGGACTAGTGGATCCTCACAGATCCTCTTCTGAGATGAG<br>TTTTTGTTCCTCGAG CTTACAAACCTGCTG |
| SEC24C-Myc-F  | GCTAGCGTTTAAACTTAAGCTTATGAATGTCAACCAGTCAGC                                      |
| SEC24C-Myc-R  | CACACTGGACTAGTGGATCCTCACAGATCCTCTTCTGAGATGAG<br>TTTTTGTTCCTCGAG GCTCAGCAGCTGCCG |
| SEC23A-Myc-F  | GCTAGCGTTTAAACTTAAGCTTATGACAACCTATTTGGAATTT                                     |
| SEC23A-Myc-R  | CACACTGGACTAGTGGATCCTCACAGATCCTCTTCTGAGATGAG<br>TTTTTGTTCCTCGAG AGCAGCACTTGACAC |
| SEC23B-Myc-F  | GCTAGCGTTTAAACTTAAGCTTATGGCAACATATCTGGAATTC                                     |
| SEC23B-Myc-R  | CACACTGGACTAGTGGATCCTCACAGATCCTCTTCTGAGATGAG<br>TTTTTGTTCCTCGAG AGAGGCACTGGACAC |
| Scrambled     | GTTCTCCGAACGTGTCACGT                                                            |
| WFS1-shRNA-1  | GGAGCAGGACAAGATTGAACC                                                           |
| WFS1-shRNA-2  | GCCGAGAAGGGACAGATAAAG                                                           |
| WFS1-shRNA-3  | GCAGTGAATCCAAGAACTACA                                                           |
| WFS1-shRNA-4  | GCAACCTAACCATCGACTTCT                                                           |

Supplementary Table 3. The antibodies are used in this study.

| Antibodies                                                                               | Company name, catalog number, dilution               |
|------------------------------------------------------------------------------------------|------------------------------------------------------|
| WFS1 for IB                                                                              | Proteintech, 26995-1-AP, 1:1000                      |
| WFS1 for IP                                                                              | LSBio, LS-C661616, 1:200                             |
| $\beta$ -Tubulin                                                                         | Sungene biotech, KM9003T, 1:2000                     |
| Proinsulin                                                                               | Hytest, CCI-17, 1:200 for IF or 1:2000 for IB        |
| Insulin                                                                                  | Abcam, ab7842, 1:200 for IF or 1:1000 for IB         |
| Calnexin                                                                                 | Biorbyt, orb46780, 1:200 for IF or 1:1000 for IB     |
| GM130                                                                                    | Invitrogen, PA5-95727, 1:200 for IF or 1:1000 for IB |
| HA-tag for IB                                                                            | Cell Signaling Technology, 2367S, 1:2000             |
| HA-tag for IP (Beads)                                                                    | Thermo Scientific, 88836, 100 $\mu$ L                |
| GFP-tag                                                                                  | Proteintech, 50430-2-AP, 1:1000                      |
| Myc-tag                                                                                  | Cell Signaling Technology, 2278S, 1:200 for IF       |
| His-tag                                                                                  | Proteintech, 66005-1-Ig, 1:1000                      |
| $\beta$ -Actin                                                                           | Proteintech, 66009-1-Ig, 1:2000                      |
| NPY                                                                                      | Cell Signaling Technology, 11976S, 1:1000            |
| CPE                                                                                      | BD Biosciences, 610758, 1:1000                       |
| SCG5                                                                                     | Invitrogen, PA5-68244, 1:300                         |
| GCG                                                                                      | Abcam, ab92517, 1:1000                               |
| Goat anti-mouse IgG (H+L), HRP conjugate                                                 | Proteintech, SA00001-1, 1:5000                       |
| Goat Anti-Rabbit IgG(H+L), HRP conjugate                                                 | Proteintech, SA00001-2, 1:5000                       |
| Goat anti-Rabbit IgG (H+L) Cross-Adsorbed Secondary Antibody, Alexa Fluor 488            | Invitrogen, A-11008, 1:500                           |
| Goat anti-Mouse IgG (H+L) Highly Cross-Adsorbed Secondary Antibody, Alexa Fluor Plus 647 | Invitrogen, A32728, 1:500                            |
| Rhodamine (TRITC) AffiniPure Goat Anti-Guinea Pig IgG (H+L),                             | Jackson IR, 106-025-003, 1:500                       |
